# Supplementary material for: Screening of novel halide perovskites for photocatalytic water splitting using multi-fidelity machine learning
Source: Royal Society of Chemistry journal article supplement (doi:10.1039/d4cp02330g), 2024-01-01
Supplement: d4cp02330g3.xlsx [file d4cp02330g3.xlsx]

## Sheet: Sheet1
Compund	Phase	Eg (PBE)	Eg (HSE+SOC)	Gap-type	Decomp_PBE	Decomp_HSE	m*e	m*h	STH (%)			mf1-ML-predicted	Decomp_PBE	Decomp_HSE	Eg (HSE-SOC)
CsCa_0.25Ge_0.75Br_3	1	1.44	1.9	Direct	-0.23	-0.2	0.209	0.528	24.18				-0.23	-0.19	2.22
FACa_0.375Sn_0.625I_3	1	1.76	2.16	Direct	-0.05	0.05	0.335	0.439	17.82				0.07	0.05	2.4
CsCa_0.25Ge_0.50Pb_0.25Br_3	1	1.57	1.86	Direct	-0.19	-0.24	0.223	0.492	24.18				-0.22	-0.19	2.14
CsCa_0.25Ge0.25Pb_0.50Br_3	2	1.92	2.12	Direct	-0.22	-0.35	1.815	0.971	20.31				-0.21	-0.25	2.12
CsGe_0.875Sr_0.125Br_3	3	1.72	2.33	Direct	-0.29	-0.3	0.247	0.316	16.14				-0.26	-0.25	2.17
	1	Cubic
	2	Tetragonal
	3	Orthorhombic
	4	Hexagonal
